# Supplementary material for: Dynamics of 5-methylcytosine and 5-hydroxymethylcytosine during germ cell reprogramming
Source: PubMed Central journal article supplement — Cell Res. 2013 Feb 12;23(3):329–39. doi: 10.1038/cr.2013.22 (PMC3587712; doi:10.1038/cr.2013.22), 2013-02-12
Supplement: cr201322x1.pdf [file cr201322x1.pdf]

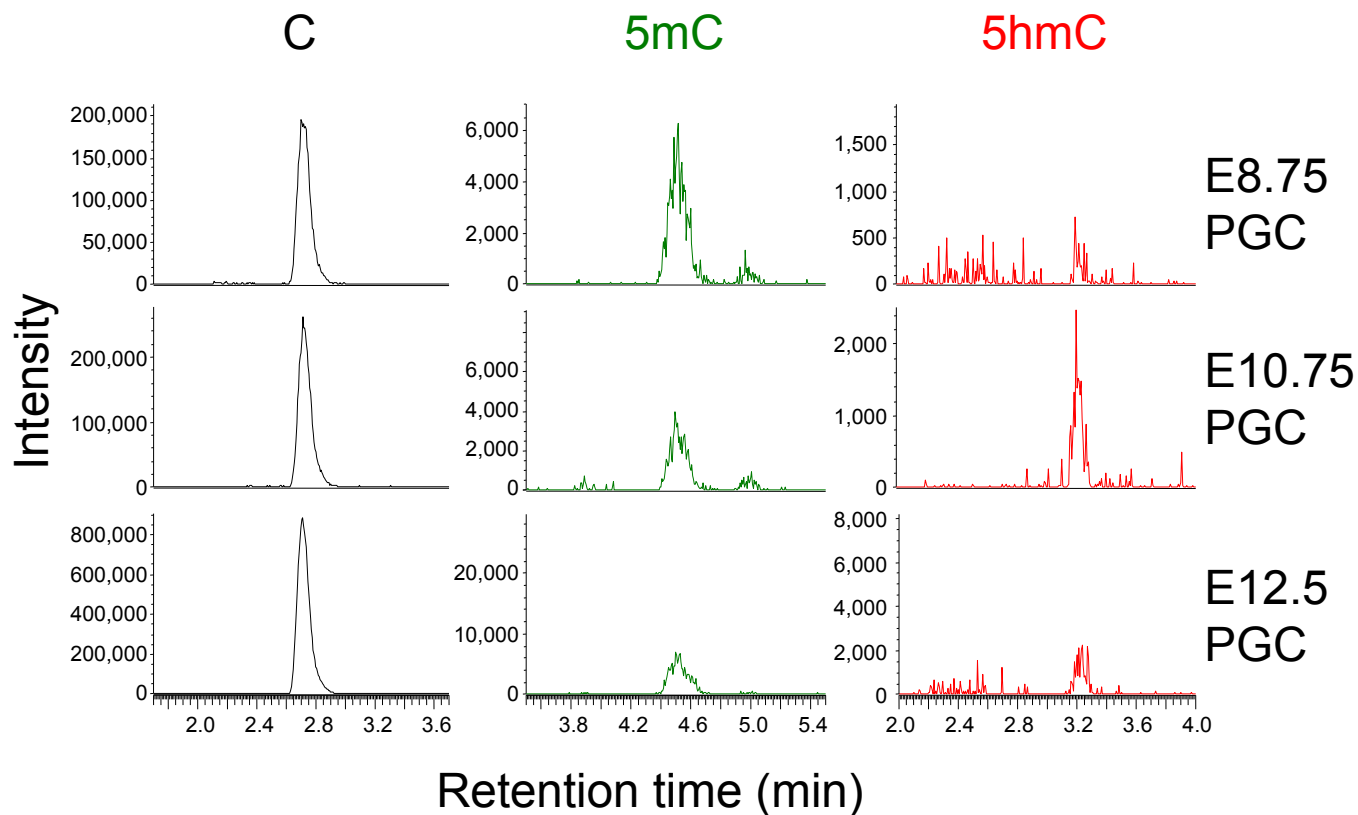

**FigureS1. LC-MS/MS chromatograms of C, 5mC, and 5hmC of the DNA purified from E8.75, E10.75, and E12.5 PGCs**

The Y axes represent the MS signal intensity, and their scales for 5mC or 5hmC have been normalized to the scales for C. The parts of the chromatograms within the indicated retention times are displayed.
