# Supplementary material for: Dynamics of 5-methylcytosine and 5-hydroxymethylcytosine during germ cell reprogramming
Source: PubMed Central journal article supplement — Cell Res. 2013 Feb 12;23(3):329–39. doi: 10.1038/cr.2013.22 (PMC3587712; doi:10.1038/cr.2013.22), 2013-02-12
Supplement: cr201322x2.pdf [file cr201322x2.pdf]

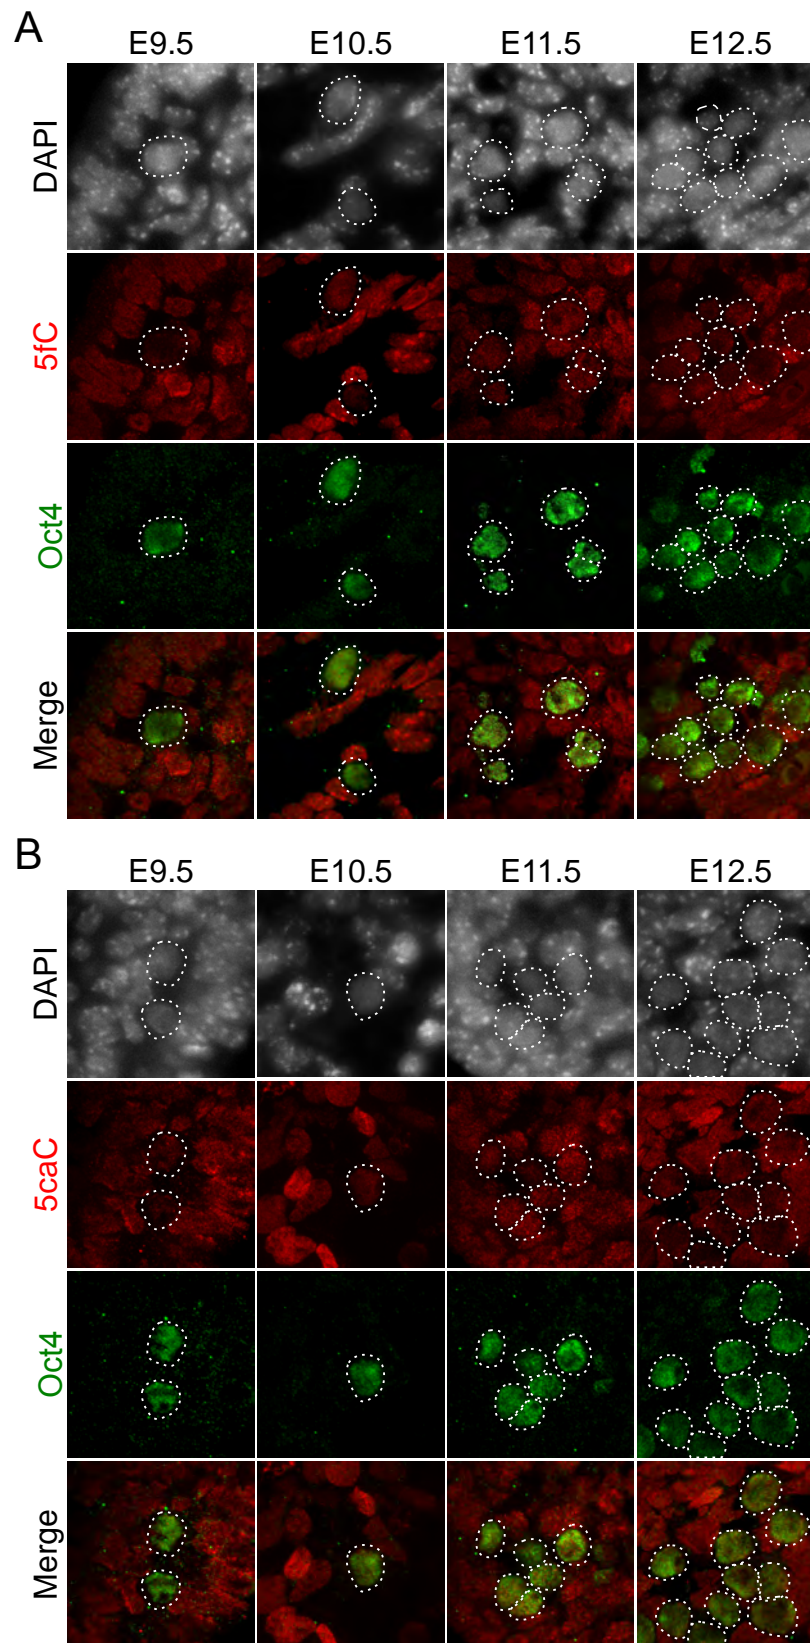

**Figure S2. No accumulation of 5fC or 5caC during PGC reprogramming**

Representative images of reprogramming PGCs stained with the 5fC antibody (A) or 5caC antibody (B) from cryosections of mouse embryos (E9.5-11.5) or genital ridges (E12.5). Dashed circles indicate germ cells, which express Oct4.
