# Supplementary material for: Dynamics of 5-methylcytosine and 5-hydroxymethylcytosine during germ cell reprogramming
Source: PubMed Central journal article supplement — Cell Res. 2013 Feb 12;23(3):329–39. doi: 10.1038/cr.2013.22 (PMC3587712; doi:10.1038/cr.2013.22), 2013-02-12
Supplement: cr201322x3.pdf [file cr201322x3.pdf]

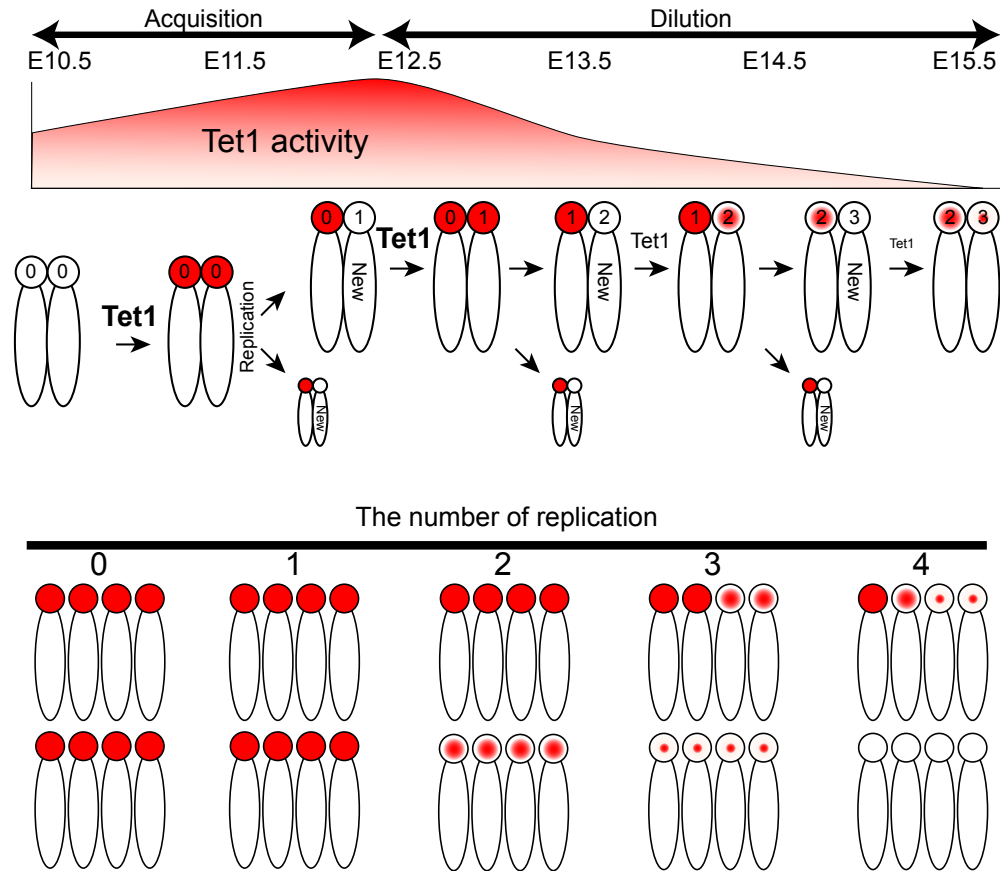

**Figure S3. Diagrammatic illustration of how variations in the number and level of pericentric 5hmC may be generated**

Because PGC development is not synchronized and the activity of Tet1 may be variable during PGC development, 5hmC levels in pericentric heterochromatin exhibits variable patterns depending on the number of replications after the peak of 5hmC. The pericentric regions that have just acquired 5hmC (0 and 1) have high levels of 5hmC, while those that replicated several times (2-4) have lower levels of 5hmC.
