# Supplementary material for: Dynamics of 5-methylcytosine and 5-hydroxymethylcytosine during germ cell reprogramming
Source: PubMed Central journal article supplement — Cell Res. 2013 Feb 12;23(3):329–39. doi: 10.1038/cr.2013.22 (PMC3587712; doi:10.1038/cr.2013.22), 2013-02-12
Supplement: cr201322x4.pdf [file cr201322x4.pdf]

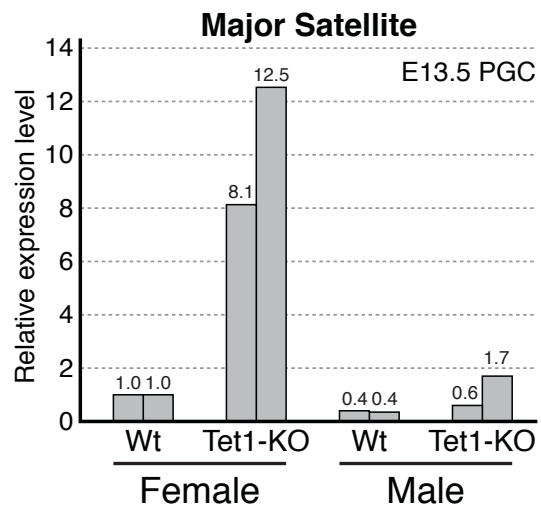

**Figure S4. Tet1 mediated pericentric 5hmC generation suppresses major satellite expression**

RT-qPCR analysis of major satellite repeat in purified PGCs. CT values were normalized to Gapdh, and wild-type female PGC was set as 1. Two biological replicates are shown.
