# Supplementary material for: Dynamics of 5-methylcytosine and 5-hydroxymethylcytosine during germ cell reprogramming
Source: PubMed Central journal article supplement — Cell Res. 2013 Feb 12;23(3):329–39. doi: 10.1038/cr.2013.22 (PMC3587712; doi:10.1038/cr.2013.22), 2013-02-12
Supplement: cr201322x5.pdf [file cr201322x5.pdf]

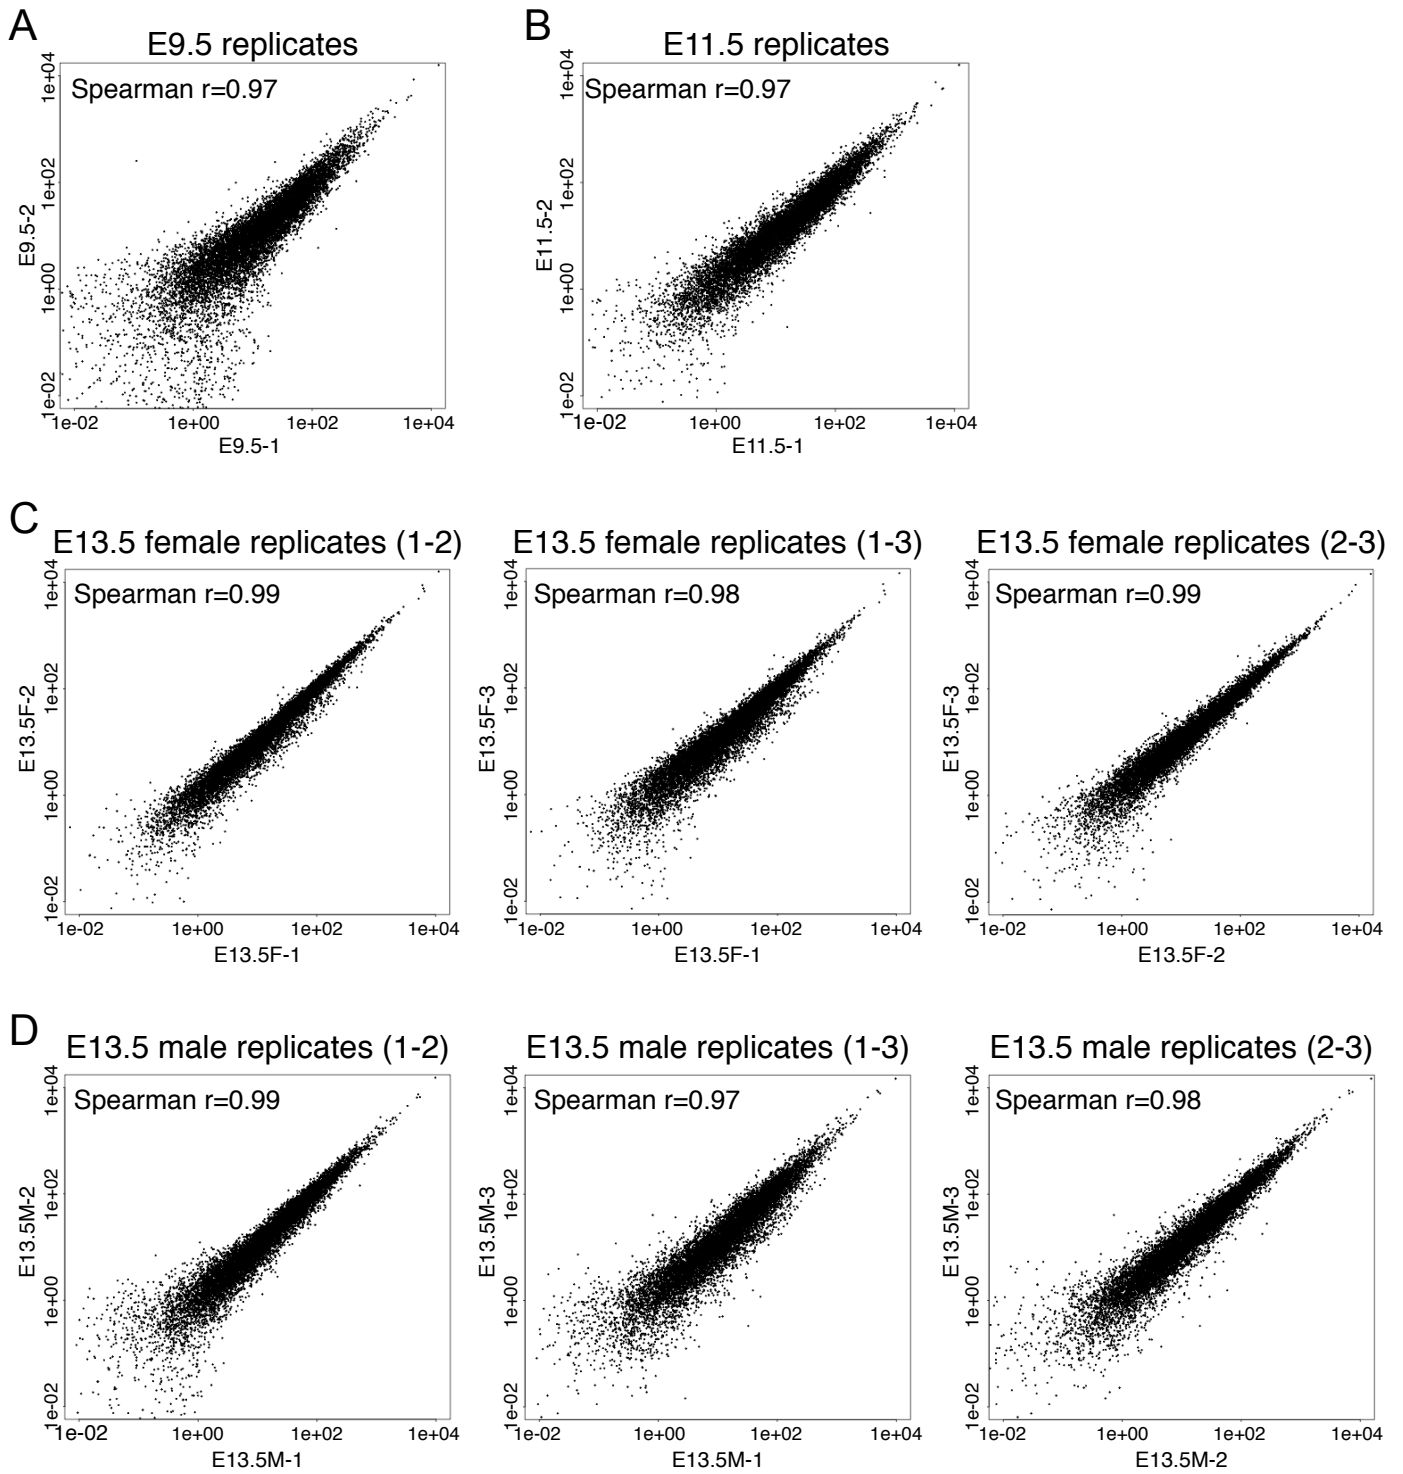

**Figure S5. Biological replicates of RNA-seq data is highly reproducible**

(A-D) Correlation of RNA-seq data from replicates in E9.5 (A), E11.5 (B), and E13.5 female (C) and male (D) PGCs.
