# Supplementary material for: Dynamics of 5-methylcytosine and 5-hydroxymethylcytosine during germ cell reprogramming
Source: PubMed Central journal article supplement — Cell Res. 2013 Feb 12;23(3):329–39. doi: 10.1038/cr.2013.22 (PMC3587712; doi:10.1038/cr.2013.22), 2013-02-12
Supplement: cr201322x6.pdf [file cr201322x6.pdf]

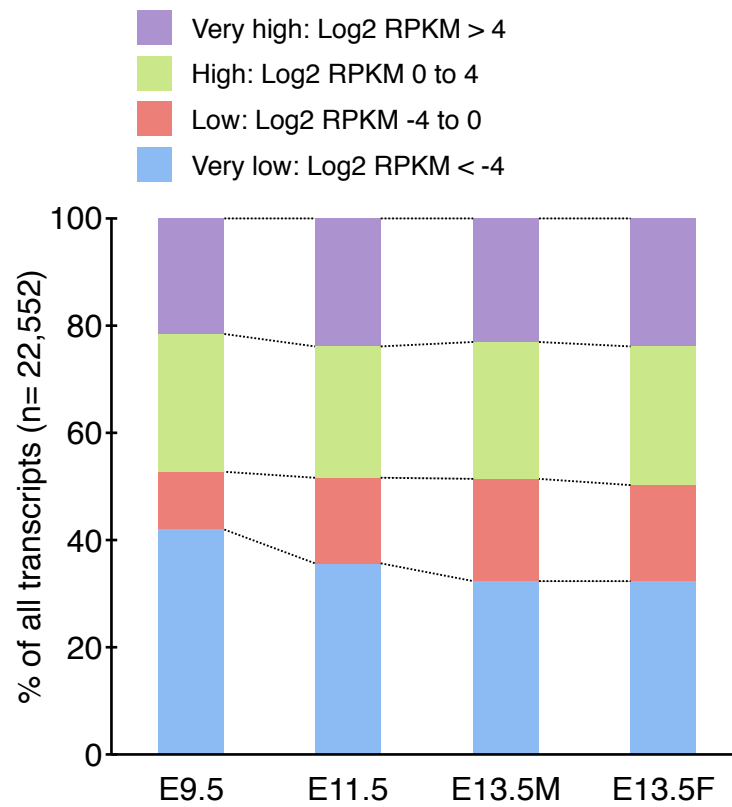

**Figure S6. Global activation of gene expression during PGC reprogramming**

Genes are grouped based on their level of expression (very high, high, low, and very low expression group in all transcripts). The distribution of the different groups during PGC reprogramming is shown
