# Supplementary material for: Dynamics of 5-methylcytosine and 5-hydroxymethylcytosine during germ cell reprogramming
Source: PubMed Central journal article supplement — Cell Res. 2013 Feb 12;23(3):329–39. doi: 10.1038/cr.2013.22 (PMC3587712; doi:10.1038/cr.2013.22), 2013-02-12
Supplement: cr201322x7.pdf [file cr201322x7.pdf]

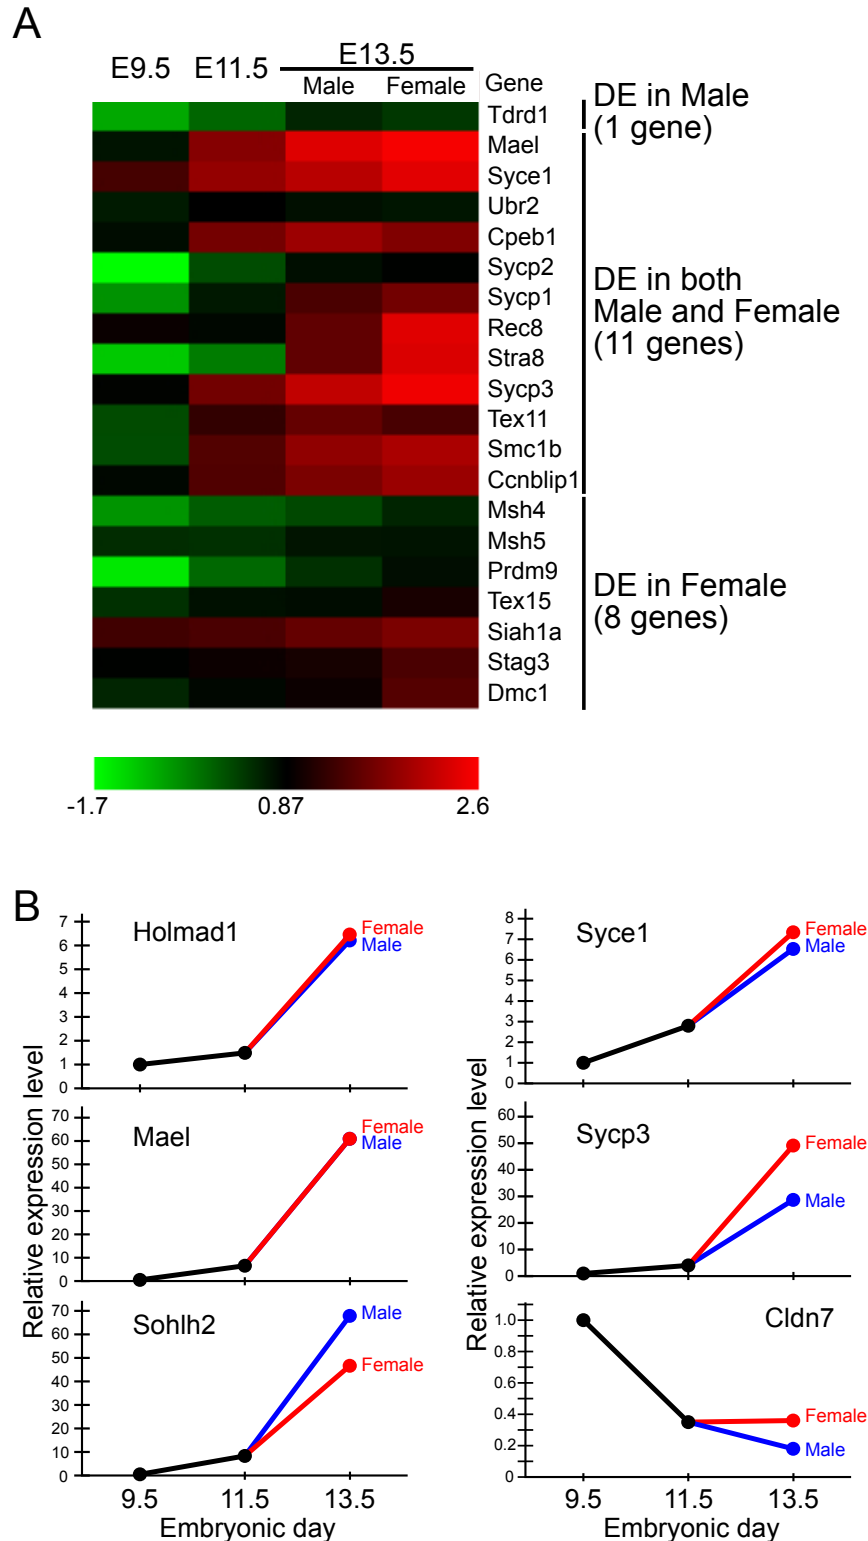

**Figure S7. Meiotic genes are significantly up-regulated in both male and female E13.5 PGCs**

(A) Heat map representation of meiotic genes during PGC reprogramming. Expression levels of the genes with the gene ontology term “meiosis” are shown.

(B) RT-qPCR verification of the significantly changed genes from E9.5 to E13.5 PGCs. To avoid biased amplification, purified PGCs from three embryos of each stage were combined and analyzed. The expression level in E9.5 PGCs was set as 1.
