# Supplementary material for: Dynamics of 5-methylcytosine and 5-hydroxymethylcytosine during germ cell reprogramming
Source: PubMed Central journal article supplement — Cell Res. 2013 Feb 12;23(3):329–39. doi: 10.1038/cr.2013.22 (PMC3587712; doi:10.1038/cr.2013.22), 2013-02-12
Supplement: cr201322x8.pdf [file cr201322x8.pdf]

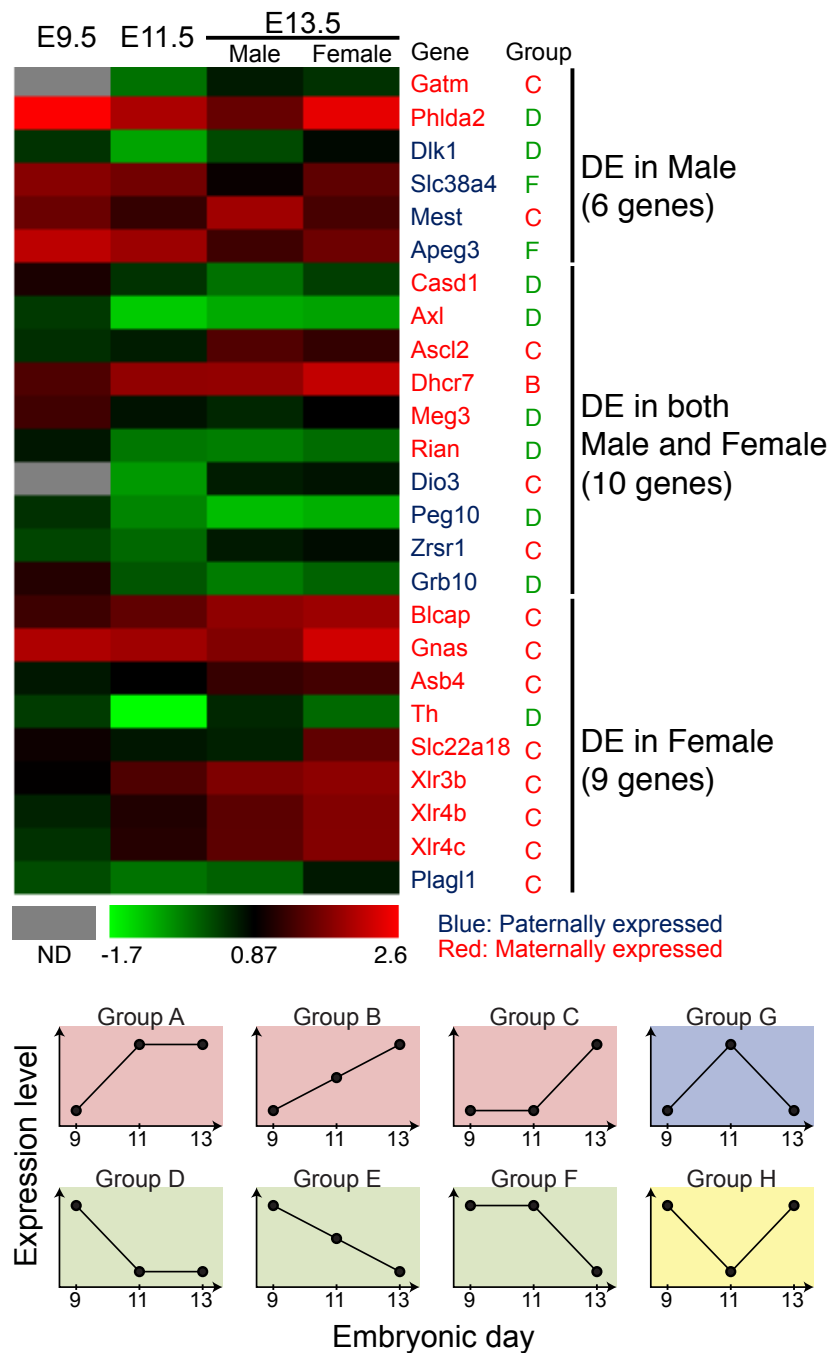

**Figure S8. List of imprinted genes whose expression was significantly changed in both male and female E13.5 PGCs**

Heat map representation of imprinted genes. DE: differentially expressed. The gene group to which each gene belongs to is indicated, and the expression patterns of each group are illustrated in the bottom panel.
